# Supplementary material for: Comparative effect of cationic gemini surfactant and its monomeric counterpart on the conformational stability and activity of lysozyme
Source: Royal Society of Chemistry journal article supplement (doi:10.1039/c7ra00172j), 2017-01-01
Supplement: c7ra00172j1.pdf [file c7ra00172j1.pdf]

### Supplementary Data

#### Comparative effect of cationic gemini surfactant and its monomeric counterpart on the conformational stability and activity of lysozyme

Taruna Sharma<sup>a</sup>, Neeraj Dohare<sup>a</sup>, Meena Kumari<sup>a</sup>, Upendra Kumar Singh<sup>a</sup>, Mahendra S. Borse<sup>b</sup>  
and Rajan Patel<sup>a\*</sup>

<sup>a</sup>Biophysical Chemistry Laboratory, Centre for Interdisciplinary Research in Basic Sciences,  
Jamia Millia Islamia (A Central University), New Delhi.

<sup>b</sup>Department of Chemistry, Uttamrao Patil College Dahivel Taluka-sakri, Dhule, Maharashtra,  
India.

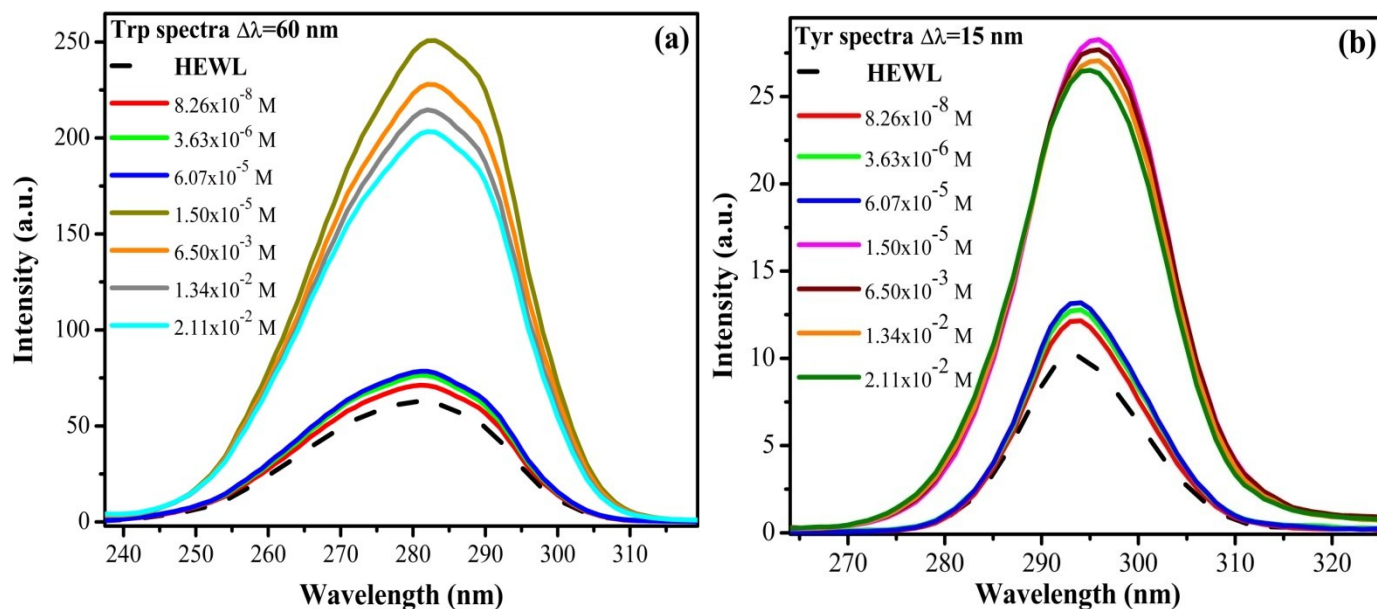

Fig 1S: Synchronous fluorescence spectra of HEWL at varying concentration of  $M_{16}$  (a)  $\Delta\lambda=60$  nm and (b)  $\Delta\lambda=15$  nm at 298K.

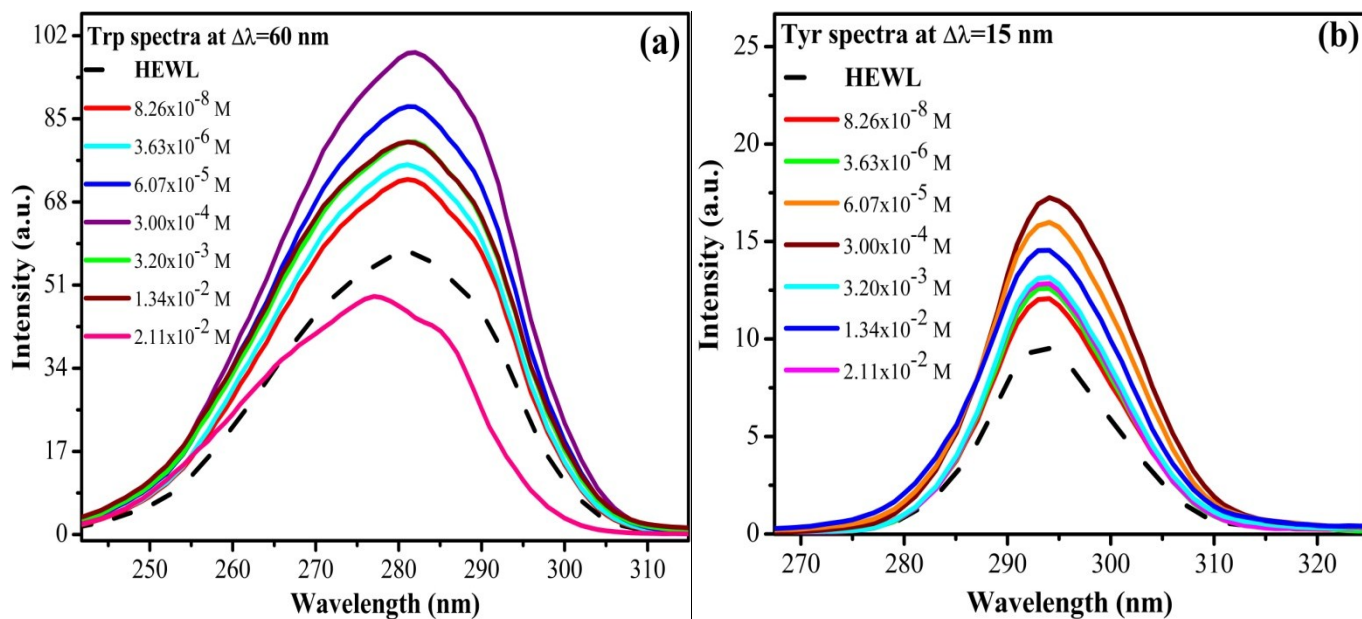

Fig 2S: Synchronous fluorescence spectra of HEWL at varying concentration of  $G_{16}$  (a)  $\Delta\lambda=60$  nm (b)  $\Delta\lambda=15$  nm at 298K.

**Table S1. Calculation of  $\alpha$ -helical content of HEWL in different  $M_{16}$  and  $G_{16}$  concentrations<sup>a</sup>**

| Concentration of surfactant (M) | $\alpha$ -helix (%)               |
|---------------------------------|-----------------------------------|
| <b><math>M_{16}</math></b>      |                                   |
| 0                               | 41.54 <sup>b</sup>                |
| $8.26 \times 10^{-8}$ M         | 42.84                             |
| $6.39 \times 10^{-7}$ M         | 43.33                             |
| $2.10 \times 10^{-4}$ M         | 43.69                             |
| $1.50 \times 10^{-3}$ M         | 44.56                             |
| $3.20 \times 10^{-3}$ M         | 39.33                             |
| $>3.20 \times 10^{-3}$ M        | Cannot be determined <sup>c</sup> |
| <b><math>G_{16}</math></b>      |                                   |
| 0                               | 42.10 <sup>b</sup>                |
| $8.26 \times 10^{-8}$ M         | 44.68                             |
| $2.10 \times 10^{-4}$ M         | 43.69                             |
| $3.00 \times 10^{-4}$ M         | 41.90                             |
| $1.50 \times 10^{-3}$ M         | 41.12                             |
| $>1.50 \times 10^{-3}$ M        | Cannot be determined <sup>c</sup> |

<sup>a</sup>Uncertainty in results is  $\pm 1\%$ , <sup>b</sup>Native HEWL<sup>1</sup>, <sup>c</sup>Due to noise in CD spectra at higher concentration of  $M_{16}$  and  $G_{16}$ .

**Table S2: Fluorescence lifetime parameters of HEWL at various  $M_{16}$  concentrations**

| $M_{16}$ (M)          | $\alpha_1$ (%) | $\tau_1$ (ns) | $\alpha_2$ (%) | $\tau_2$ (ns) | $\alpha_3$ (%) | $\tau_3$ (ns) | $\tau_{avg}$ | $\chi^2$ |
|-----------------------|----------------|---------------|----------------|---------------|----------------|---------------|--------------|----------|
| 0                     | 11.08          | 0.36          | 60.81          | 1.37          | 28.11          | 2.81          | 2.03         | 0.86     |
| $8.26 \times 10^{-8}$ | 12.09          | 0.39          | 60.66          | 1.38          | 27.25          | 2.82          | 2.02         | 0.86     |
| $6.39 \times 10^{-7}$ | 15.02          | 0.45          | 63.68          | 1.50          | 21.30          | 2.99          | 2.03         | 0.82     |
| $3.63 \times 10^{-6}$ | 10.87          | 0.33          | 60.80          | 1.36          | 28.33          | 2.83          | 2.04         | 0.87     |
| $4.68 \times 10^{-6}$ | 16.31          | 0.51          | 60.84          | 1.51          | 22.85          | 3.01          | 2.07         | 0.84     |
| $6.07 \times 10^{-5}$ | 10.22          | 0.30          | 62.54          | 1.37          | 27.24          | 2.85          | 2.04         | 0.83     |
| $2.10 \times 10^{-4}$ | 15.00          | 0.51          | 62.95          | 1.65          | 22.05          | 3.31          | 2.26         | 0.84     |
| $3.00 \times 10^{-4}$ | 14.72          | 0.53          | 55.63          | 1.77          | 29.65          | 4.82          | 3.48         | 0.93     |
| $1.50 \times 10^{-3}$ | 06.87          | 0.64          | 58.49          | 2.36          | 34.63          | 5.28          | 3.98         | 0.87     |
| $3.20 \times 10^{-3}$ | 17.91          | 0.66          | 52.37          | 2.48          | 29.73          | 5.28          | 3.88         | 0.82     |
| $6.50 \times 10^{-3}$ | 13.93          | 0.72          | 55.22          | 2.28          | 30.85          | 5.02          | 3.68         | 0.97     |
| $1.34 \times 10^{-2}$ | 14.06          | 0.71          | 55.85          | 2.04          | 30.09          | 4.73          | 3.43         | 0.93     |
| $2.11 \times 10^{-2}$ | 15.62          | 0.62          | 52.77          | 1.87          | 31.61          | 4.51          | 3.32         | 0.92     |

$(\tau) = (\alpha_1 \tau_1 + \alpha_2 \tau_2) / (\alpha_1 + \alpha_2)^b \pm 0.05$ . The magnitude of  $\chi^2$  denotes the goodness of the fit.

**Table S3: Fluorescence lifetime parameters of HEWL at various  $G_{16}$  concentrations**

| $G_{16}$ (M)          | $\alpha_1$ (%) | $\tau_1$ (ns) | $\alpha_2$ (%) | $\tau_2$ (ns) | $\alpha_3$ (%) | $\tau_3$ (ns) | $\tau_{avg}$ | $\chi^2$ |
|-----------------------|----------------|---------------|----------------|---------------|----------------|---------------|--------------|----------|
| 0                     | 11.08          | 0.36          | 60.81          | 1.37          | 28.11          | 2.81          | 2.03         | 0.86     |
| $8.26 \times 10^{-8}$ | 14.48          | 0.49          | 61.90          | 1.51          | 23.63          | 3.01          | 2.09         | 0.76     |
| $6.39 \times 10^{-7}$ | 14.82          | 0.48          | 60.98          | 1.50          | 24.21          | 2.98          | 2.08         | 0.79     |
| $3.63 \times 10^{-6}$ | 14.65          | 0.50          | 56.98          | 1.44          | 28.37          | 2.90          | 2.10         | 0.87     |
| $4.68 \times 10^{-6}$ | 11.40          | 0.39          | 59.23          | 1.41          | 29.37          | 2.91          | 2.12         | 0.83     |
| $6.07 \times 10^{-5}$ | 18.68          | 0.61          | 62.17          | 1.79          | 19.15          | 5.03          | 3.15         | 0.78     |
| $2.10 \times 10^{-4}$ | 18.34          | 0.61          | 59.62          | 1.84          | 22.04          | 5.16          | 3.39         | 0.85     |
| $3.00 \times 10^{-4}$ | 18.88          | 0.63          | 59.98          | 1.85          | 21.14          | 5.21          | 3.37         | 0.85     |
| $1.50 \times 10^{-3}$ | 19.27          | 0.67          | 60.77          | 1.74          | 19.69          | 5.56          | 3.51         | 0.87     |
| $3.20 \times 10^{-3}$ | 19.27          | 0.67          | 60.77          | 1.87          | 19.69          | 5.61          | 3.55         | 0.85     |
| $6.50 \times 10^{-3}$ | 18.25          | 0.72          | 65.32          | 1.87          | 14.33          | 6.35          | 3.61         | 0.97     |
| $1.34 \times 10^{-2}$ | 29.06          | 0.70          | 64.41          | 2.11          | 06.53          | 8.86          | 3.80         | 0.93     |
| $2.11 \times 10^{-2}$ | 32.20          | 0.77          | 59.84          | 2.21          | 07.96          | 9.49          | 4.42         | 0.92     |

$(\tau) = (\alpha_1 \tau_1 + \alpha_2 \tau_2) / (\alpha_1 + \alpha_2)^b \pm 0.05$ . The magnitude of  $\chi^2$  denotes the goodness of the fit.

**Table S4. Critical micelle concentration (*cmc*) values of surfactants in different media<sup>a</sup>**

| Surfactant      | <i>cmc</i>                |                         |
|-----------------|---------------------------|-------------------------|
|                 | Pure water <sup>2-3</sup> | HEWL (0.3 mg)           |
| M <sub>16</sub> | 2.40x10 <sup>-4</sup> M   | 2.60x10 <sup>-4</sup> M |
| G <sub>16</sub> | 3.63x10 <sup>-6</sup> M   | 3.91x10 <sup>-6</sup> M |

<sup>a</sup>Uncertainty of *cmc* is ±0.1

**Table S5. Relative activity of HEWL in different M<sub>16</sub> and G<sub>16</sub> concentrations<sup>c</sup>**

| Concentration of surfactant (M) | RA <sup>a</sup> (%) | Relative error <sup>b</sup> (5%) |
|---------------------------------|---------------------|----------------------------------|
| <b>M<sub>16</sub></b>           |                     |                                  |
| 0                               | 100                 | 5.00                             |
| 8.30x10 <sup>-8</sup>           | 72.89               | 3.64                             |
| 6.39x10 <sup>-7</sup>           | 80.75               | 4.03                             |
| 3.63x10 <sup>-6</sup>           | 82.11               | 4.10                             |
| 1.20x10 <sup>-4</sup>           | 86.17               | 4.30                             |
| 2.10x10 <sup>-4</sup>           | 86.99               | 4.34                             |
| 3.00x10 <sup>-4</sup>           | 75.88               | 3.79                             |
| 3.20x10 <sup>-3</sup>           | 36.04               | 1.80                             |
| >3.20x10 <sup>-3</sup>          | No activity         | -                                |
| <b>G<sub>16</sub></b>           |                     |                                  |
| 0                               | 100                 | 5.00                             |
| 8.30x10 <sup>-8</sup>           | 61.24               | 3.06                             |
| 6.30x10 <sup>-7</sup>           | 66.12               | 3.30                             |
| 3.63x10 <sup>-6</sup>           | 76.15               | 3.80                             |
| 3.40x10 <sup>-5</sup>           | 82.92               | 4.14                             |
| 1.20x10 <sup>-4</sup>           | 92.14               | 4.60                             |
| 2.10x10 <sup>-4</sup>           | 94.30               | 4.71                             |
| 3.00x10 <sup>-4</sup>           | 117.61              | 5.88                             |
| >3.00x10 <sup>-4</sup>          | No activity         | -                                |

<sup>a</sup>%RA calculated using eq 6, where the initial slope is fitted by taking adj. R-square value ~0.99

<sup>b</sup>Relative error is calculated through OriginPro 8.5. <sup>c</sup>Uncertainty in %RA is ±5%.

### References:

- 1 A. Sethuraman and G. Belfort, *Biophys. J.*, 2005, **88**, 1322-1333.
- 2 D. Tikariha, N. Singh, M. L. Satnami, K. K. Ghosh, N. Barbero and P. Quagliotto, *Colloids Surf., A*, 2012, **411**, 1-11.
- 3 B. S. S. and P. T. J., *J. chem. pharm. res.*, 2014, **6**, 904-911.
